# Supplementary material
Source: PubMed Central journal article supplement (PMC397416)
Supplement: pnas_101_15_5524__2.pdf [file pnas_101_15_5524__2.pdf]

**Table 4. Primer sequences for qPCR**

| Gene name                                                                          | GenBank no. | Primer sequences (5'-3')<br>(forward and reverse primers)       | Product size, bp |
|------------------------------------------------------------------------------------|-------------|-----------------------------------------------------------------|------------------|
| Metallothionein 1                                                                  | V00835      | CTCCTGCGCCTGCAAGAAGCTG<br>ACACAGCCCTGGGCACATTTG                 | 96               |
| Arginase 1, liver                                                                  | U51805      | AAAGGAAAGTTCCCAGATGTACCAGG<br>TATAGTGTTCCCCAGGGTCTACGTCTC       | 109              |
| N-sulfotransferase                                                                 | AF026073    | CTCTTGGTCTTGAAATGTACAGATATCAGG<br>GGCCACTGAGACTATTTTCAGACAGG    | 192              |
| Carbonic anhydrase 3                                                               | M27796      | CCTTCAAGTAAGGCTCTGAGCTTGC<br>GTGAAATTCATGCTTCTGGGTGAGA          | 183              |
| Major urinary protein 4                                                            | M16358      | TTGACTTAACCAAAACCAATCGCTG<br>TGTGAGACAGGATGGAAAGCAGATC          | 165              |
| Glucose-6-phosphatase,<br>catalytic                                                | U00445      | TGTGCTTGCATTCCCTGTATGGTAGTG<br>AACAGTTGCCTACCAGACACAGCAG        | 161              |
| Phenylalanine hydroxylase                                                          | X51942      | GTCTGTTCATTTTTACCTCTCAGGTAAGC<br>AGTTCTCAGAGCCATAATGAATGAATGTAG | 156              |
| CCR4 carbon catabolite<br>repression 4-like<br>( <i>Saccharomyces cerevisiae</i> ) | U70139      | TTGCTGATCGAACAGGATGTACACTA<br>AGAAGTCAAAGGCATAGCAAACAGG         | 111              |
| Hydroxyprostaglandin<br>dehydrogenase 15 (NAD)                                     | U44389      | TCTCCATTACTCGTAAAAGCTCCATAACC<br>GATACAGGAAGGTAGGTTTTCATCGTATGG | 143              |
| Transcription elongation<br>factor A (SII) 1                                       | M18209      | CCAGCTGAAATGTAGGCTGTAGCAA<br>ACAGGAGTCTGAACACAGGCAGAAG          | 199              |
